# Supplementary material for: Dual release kinetics in a single dosage from core–shell hydrogel scaffolds
Source: PubMed Central journal article supplement (PMC9086265; doi:10.1039/c8ra05358h), 2018-09-21
Supplement: RA-008-C8RA05358H-s001.pdf [file RA-008-C8RA05358H-s001.pdf]

## Dual Release Kinetics in Single Dosage from Core-Shell Hydrogel Scaffolds

Finaz Khan,<sup>a</sup>Debbethi Bera,<sup>d</sup>Santanu Palchoudhuri,<sup>b</sup>Rajesh Bera,<sup>c</sup> Madhumita

Mukhopadhyay<sup>a</sup>, Anindita Dey,<sup>e</sup> Soumyabrata Goswami<sup>a</sup> and Susmita Das <sup>a,\*</sup>

<sup>a</sup> Amity Institute of Applied Sciences, Department of Chemistry, Amity University Kolkata, Major Arterial Road, Action Area II, Kadampukur Village, Rajarhat, Newtown, West Bengal 700135, India.

<sup>b</sup>Amity Institute of Biotechnology, Amity University Kolkata, Major Arterial Road, Action Area II, Kadampukur Village, Rajarhat, Newtown, West Bengal 700135, India.

<sup>c</sup> Indian Association for the Cultivation of Sciences, 2A & 2B Raja S C Mullick Road, Poddar Nagar, Jadavpur, Kolkata, West Bengal 700032, India.

<sup>d</sup>Department of Physics, Jadavpur University, Kolkata, West Bengal 700032, India

<sup>e</sup>Department of Botany, Asutosh College, Kolkata, West Bengal, India

\*Corresponding authors email id:sdas@kol.amity.edu; ssmtas@gmail.com

## Supporting Information

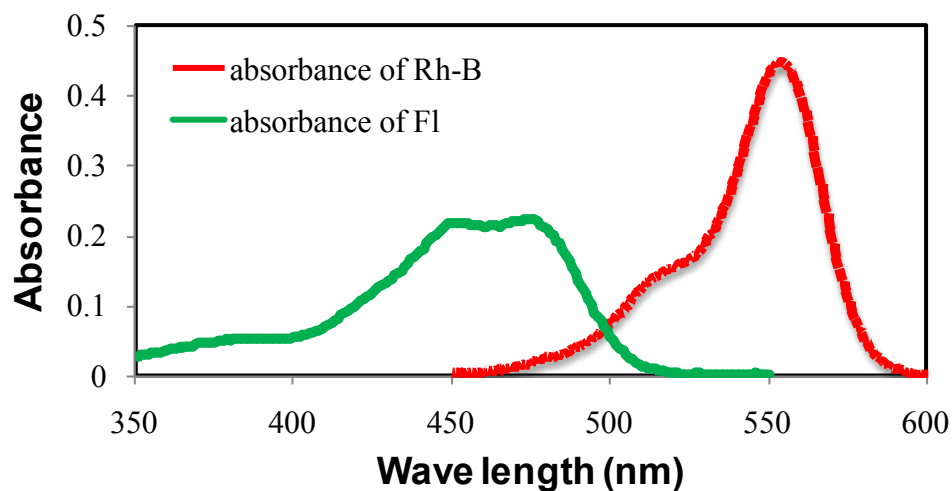

Figure S1: Absorption spectra of Fluorescein and Rhodamine B in water

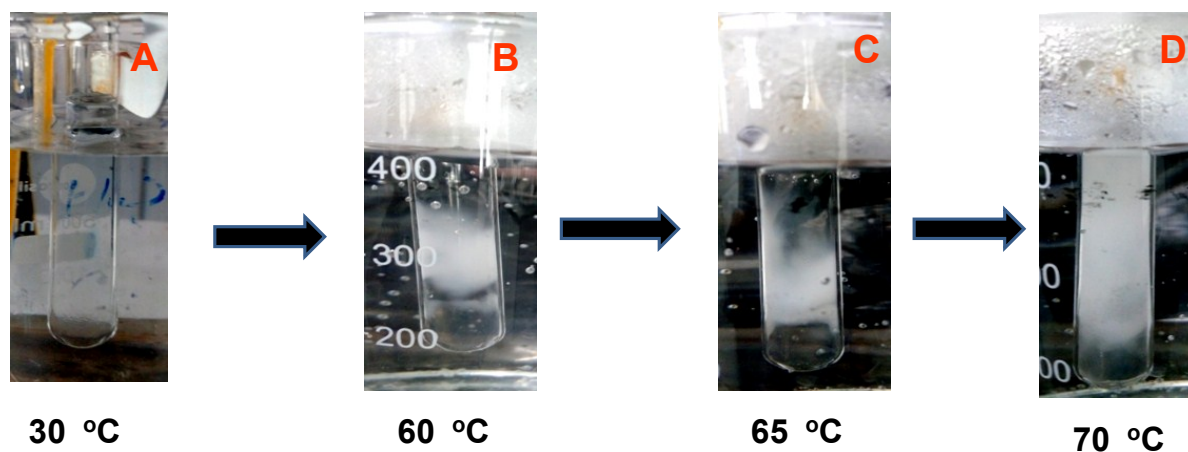

Figure S2: Sol-gel transition process of 25@250 gel showing turbidity of the core while the shell remains transparent. As the core undergoes transition to sol it slowly diffuses into the already transformed shell.

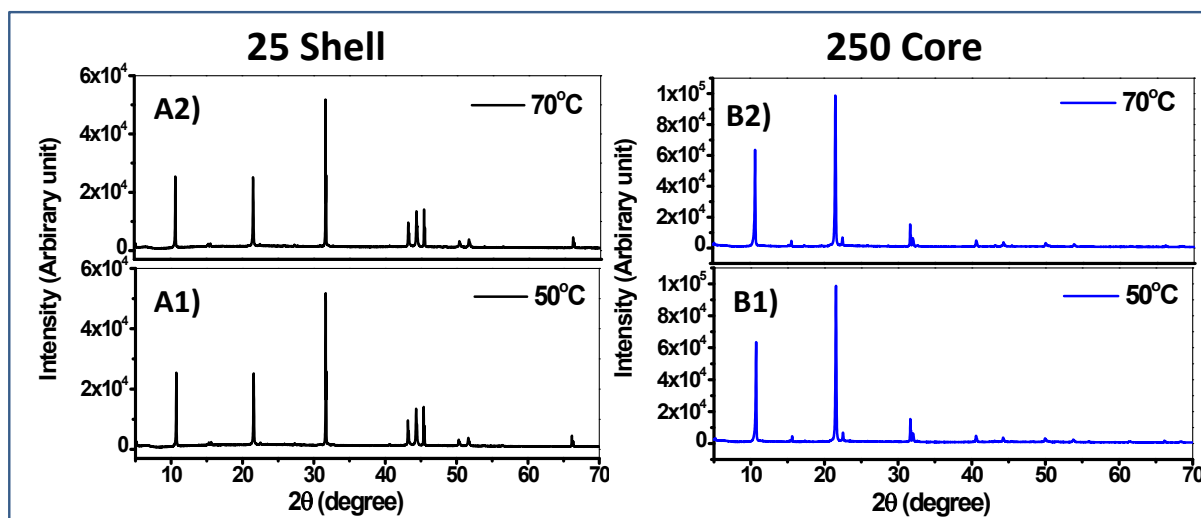

Figure S3: Temperature dependent XRD of 25 and 250 mM shell and core of 25@250 xerogels.

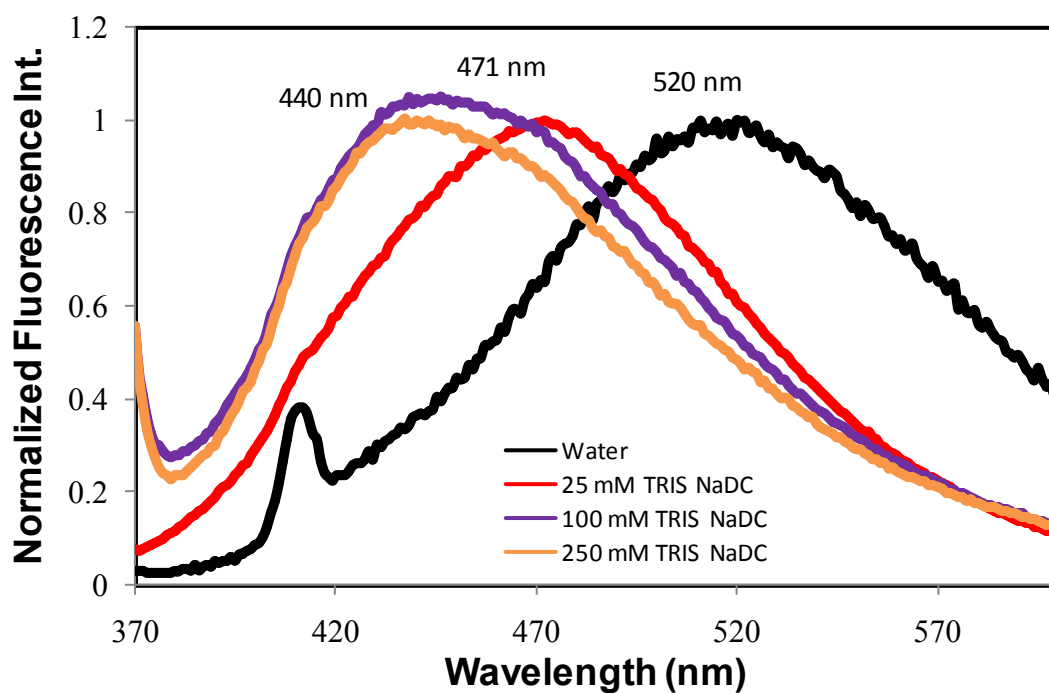

Figure S4: Fluorescence emission spectra of hydrophobicity probe ANS in the pure hydrogels with varying TRIS concentration.
